# Supplementary material for: Economic Evaluation of Bioremediation of Hydrocarbon-Contaminated Urban Soils in Chile
Source: MDPI journal article supplement (doi:10.3390/su141911854), 2022-09-21
Supplement: s1 [file s1]

**Table S2:** Total initial capital of the different bioremediation treatments. The abbreviations as following; BA, bioaugmentation, with the addition of five hydrocarbonoclastic strain; BAV, bioaugmentation with the addition of permanent air venting; BE1 and BE4, biostimulation with the addition of compost in two different ratios, 9:1 (v/v) and 3:2 (v/v), respectively; and BAE, the combination of bioaugmentation and biostimulation, using a mixture of soil and compost with 3:2 (v/v) ratio.

| <b>Machines and Equipment</b>                         | Unit Price [USD] <sup>1</sup> | <b>BE1</b>            |                    | <b>BE4</b> |                    | <b>BAE</b> |                    | <b>BA</b> |                    | <b>BAV</b> |                    |
|-------------------------------------------------------|-------------------------------|-----------------------|--------------------|------------|--------------------|------------|--------------------|-----------|--------------------|------------|--------------------|
|                                                       |                               | Quantity <sup>1</sup> | Total cost         | Quantity   | Total cost         | Quantity   | Total cost         | Quantity  | Total cost         | Quantity   | Total cost         |
| Jacketed reactor 15 m <sup>3</sup> (Culture)          | US\$78,963                    | 0                     | US\$0              | 0          | US\$0              | 6          | US\$473,778        | 6         | US\$473,778        | 6          | US\$473,778        |
| Jacketed reactor 0.3 m <sup>3</sup> (Pre-inoculation) | US\$4,543                     | 0                     | US\$0              | 0          | US\$0              | 5          | US\$22,713         | 5         | US\$22,713         | 5          | US\$22,713         |
| Blower 0.4 m <sup>3</sup> /s (Culture)                | US\$12,178                    | 0                     | US\$0              | 0          | US\$0              | 6          | US\$73,067         | 6         | US\$73,067         | 6          | US\$73,067         |
| Blower 0.0075 m <sup>3</sup> /s (Pre-inoculation)     | US\$1,063                     | 0                     | US\$0              | 0          | US\$0              | 5          | US\$5,316          | 5         | US\$5,316          | 5          | US\$5,316          |
| Blower 0.4 m <sup>3</sup> /s (Piles)                  | US\$12,178                    | 0                     | US\$0              | 0          | US\$0              | 0          | US\$0              | 0         | US\$0              | 10         | US\$121,779        |
| Spray truck 20 m <sup>3</sup>                         | US\$40,000                    | 1                     | US\$40,000         | 1          | US\$40,000         | 1          | US\$40,000         | 1         | US\$40,000         | 1          | US\$40,000         |
| Front shovel loader 2.5 m <sup>3</sup>                | US\$30,000                    | 2                     | US\$60,000         | 2          | US\$60,000         | 2          | US\$60,000         | 2         | US\$60,000         | 2          | US\$60,000         |
| <b>Total</b>                                          |                               |                       | <b>US\$100,000</b> |            | <b>US\$100,000</b> |            | <b>US\$674,874</b> |           | <b>US\$674,874</b> |            | <b>US\$796,652</b> |

| <b>Installation Services</b> | Suggested value (%) <sup>2</sup> | <b>BE1</b>             |            | <b>BE4</b> |            | <b>BAE</b> |             | <b>BA</b> |             | <b>BAV</b> |             |
|------------------------------|----------------------------------|------------------------|------------|------------|------------|------------|-------------|-----------|-------------|------------|-------------|
|                              |                                  | Value (%) <sup>3</sup> | Cost (USD) | Value (%)  | Cost (USD) | Value (%)  | Cost (USD)  | Value (%) | Cost (USD)  | Value (%)  | Cost (USD)  |
| Installation of Equipment    | 6-14                             | 3%                     | US\$7,500  | 3%         | US\$7,500  | 7%         | US\$157,470 | 7%        | US\$157,470 | 7%         | US\$185,886 |
| Instrumentation and Control  | 2-8                              | 0%                     | US\$0      | 0%         | US\$0      | 3%         | US\$67,487  | 3%        | US\$67,487  | 3%         | US\$79,665  |
| Piping                       | 3-20                             | 3%                     | US\$7,500  | 3%         | US\$7,500  | 5%         | US\$112,479 | 5%        | US\$112,479 | 5%         | US\$132,775 |
| Electrical Installation      | 2-10                             | 2%                     | US\$5,000  | 2%         | US\$5,000  | 2%         | US\$44,992  | 2%        | US\$44,992  | 2%         | US\$53,110  |
| Infrastructure               | 3-18                             | 3%                     | US\$7,500  | 3%         | US\$7,500  | 3%         | US\$67,487  | 3%        | US\$67,487  | 3%         | US\$79,665  |
| Yard Improvements            | 2-5                              | 2%                     | US\$5,000  | 2%         | US\$5,000  | 2%         | US\$44,992  | 2%        | US\$44,992  | 2%         | US\$53,110  |

|                             |      |                    |            |                    |            |                      |             |                      |             |                      |             |
|-----------------------------|------|--------------------|------------|--------------------|------------|----------------------|-------------|----------------------|-------------|----------------------|-------------|
| Services Installation       | 8-20 | 8%                 | US\$20,000 | 8%                 | US\$20,000 | 8%                   | US\$179,966 | 8%                   | US\$179,966 | 8%                   | US\$212,441 |
| Land                        | 1-2  | 1%                 | US\$2,500  | 1%                 | US\$2,500  | 1%                   | US\$22,496  | 1%                   | US\$22,496  | 1%                   | US\$26,555  |
| Engineering and Supervision | 4-21 | 20%                | US\$50,000 | 20%                | US\$50,000 | 7%                   | US\$157,470 | 7%                   | US\$157,470 | 7%                   | US\$185,886 |
| Infrastructure Expenses     | 4-16 | 4%                 | US\$10,000 | 4%                 | US\$10,000 | 4%                   | US\$89,983  | 4%                   | US\$89,983  | 4%                   | US\$106,220 |
| Contractor's fee            | 2-6  | 6%                 | US\$15,000 | 6%                 | US\$15,000 | 3%                   | US\$67,487  | 3%                   | US\$67,487  | 3%                   | US\$79,665  |
| Contingency                 | 5-15 | 8%                 | US\$20,000 | 8%                 | US\$20,000 | 6%                   | US\$134,975 | 6%                   | US\$134,975 | 6%                   | US\$159,330 |
| <b>Total</b>                |      | <b>US\$150,000</b> |            | <b>US\$150,000</b> |            | <b>US\$1,147,285</b> |             | <b>US\$1,147,285</b> |             | <b>US\$1,354,309</b> |             |

|                                          | <b>BE1</b>  | <b>BE4</b>  | <b>BAE</b>    | <b>BA</b>     | <b>BAV</b>    |
|------------------------------------------|-------------|-------------|---------------|---------------|---------------|
| <b>Total initial capital<sup>4</sup></b> | US\$250,000 | US\$250,000 | US\$1,822,159 | US\$1,822,159 | US\$2,150,961 |

The calculation of the cost of services was based on the book Plant Design and Economics for Chemical Engineers (2003), written by Peters, Timmerhaus & West, McGraw-Hill Education, fifth edition (2003).

<sup>1</sup> Unit prices and required quantities of machinery were obtained from own estimates.

<sup>2</sup> Suggested values were obtained from the book Plant Design and Economics for Chemical Engineers, written by Max S. Peters, Klaus D. Timmerhaus & Ronald E. West, McGraw-Hill Education, fifth edition (2003).

<sup>3</sup> Values (%) were chosen as a proportion for each cost item for all treatments, taking as a reference those suggested by the authors Peters, Timmerhaus & West in the book Plant Design and Economics for Chemical Engineers (2003).

<sup>4</sup> Total initial capital was defined as the resources required to acquire the assets needed for a treatment. Treatments that need the same assets, require the same amount of initial capital.
