# Supplementary material for: Economic Evaluation of Bioremediation of Hydrocarbon-Contaminated Urban Soils in Chile
Source: MDPI journal article supplement (doi:10.3390/su141911854), 2022-09-21
Supplement: s1 [file s1]

Archive with 7 entries (7 files):
- Fig_S1_Biopile_dimensions_w_header_MS.pptx
- Table_S1_Bioremediation_volumes_w_header_MS.pdf
- Table_S2_Total_initial_capital_MS.pdf
- Table_S3_Costs_ot_Biorem_Projects_w_header_MS.pdf
- Table_S4_Product_costs_and_period_costs_MS.pdf
- Table_S5_Machinery_depreciation_w_header_MS.pdf
- Table_S6_Recovery_assets_w_header_MS.pdf
