# Supplementary material for: Economic Evaluation of Bioremediation of Hydrocarbon-Contaminated Urban Soils in Chile
Source: MDPI journal article supplement (doi:10.3390/su141911854), 2022-09-21
Supplement: s1 [file s1 › Table_S1_Bioremediation_volumes_w_header_MS.pdf]

**Table S1.** Soil volume per hectare treated during each bioremediation cycle.

| Soil treated (m <sup>3</sup> /bioremediation cycle) |      |
|-----------------------------------------------------|------|
| BE1                                                 | 5625 |
| BE4                                                 | 3750 |
| BAE                                                 | 3750 |
| BA                                                  | 6250 |
| BAV                                                 | 6250 |
| Total treatment volume*                             | 7500 |

\*all bioremediation treatments were projected for 20 weeks.
