# Supplementary material for: Economic Evaluation of Bioremediation of Hydrocarbon-Contaminated Urban Soils in Chile
Source: MDPI journal article supplement (doi:10.3390/su141911854), 2022-09-21
Supplement: s1 [file s1 › Table_S3_Costs_ot_Biorem_Projects_w_header_MS.pdf]

**Table S3.** Cost of 130 bioremediation projects worldwide.

| N# | Project                                                                  | Country | State or Region | Contaminants                                   | Contaminant type    | Cost (US\$ per m <sup>3</sup> ) | Treatment                | Observations                                              | References |
|----|--------------------------------------------------------------------------|---------|-----------------|------------------------------------------------|---------------------|---------------------------------|--------------------------|-----------------------------------------------------------|------------|
| 1  | Niger Delta region                                                       | Nigeria | Niger-Delta     | TPH, petroleum hydrocarbons                    | Hydrocarbon-derived | 0.50                            | Biostimulation           | Remediate soil to 50% of initial TPH.                     | [44]       |
| 2  | Niger Delta region                                                       | Nigeria | Niger-Delta     | TPH, petroleum hydrocarbons                    | Hydrocarbon-derived | 0.70                            | Biostimulation           | Remediate soil to 50% of initial TPH.                     | [44]       |
| 3  | Niger Delta region                                                       | Nigeria | Niger-Delta     | TPH, petroleum hydrocarbons                    | Hydrocarbon-derived | 0.70                            | Biostimulation           | Remediate soil to 50% of initial TPH.                     | [44]       |
| 4  | Niger Delta region                                                       | Nigeria | Niger-Delta     | TPH, petroleum hydrocarbons                    | Hydrocarbon-derived | 1.00                            | Biostimulation           | Remediate soil to 50% of initial TPH.                     | [44]       |
| 5  | Niger Delta region                                                       | Nigeria | Niger-Delta     | TPH, petroleum hydrocarbons                    | Hydrocarbon-derived | 2.00                            | Biostimulation           | Remediate soil to 50% of initial TPH.                     | [44]       |
| 6  | Sacramento Army Depot Superfund Site, Tank 2, OU 3                       | US      | CA              | cVOCs                                          | Hydrocarbon-derived | 2.73                            | Solvent Vapor Extraction | Granular activated carbon was utilized for bioremediation | [78]       |
| 7  | Hastings Groundwater Contamination Superfund Site, Well Number 3 Subsite | US      | NE              | cVOCs                                          | Hydrocarbon-derived | 3.23                            | Solvent Vapor Extraction |                                                           | [78,79]    |
| 8  | K.I. Sawyer AFB                                                          | US      | MI              | TPH and light, nonaqueous-phase liquid (LNAPL) | Hydrocarbon-derived | 3.27                            | Bioventing               |                                                           | [78, 80]   |
| 9  | Hill AFB                                                                 | US      | UT              | JP-4 jet fuel, TPH                             | Hydrocarbon-derived | 3.53                            | Bioventing               |                                                           | [78, 81]   |

|    |                                                               |           |             |                                                  |                                        |       |                          |                                                                       |          |
|----|---------------------------------------------------------------|-----------|-------------|--------------------------------------------------|----------------------------------------|-------|--------------------------|-----------------------------------------------------------------------|----------|
| 10 | Intersil/Siemens Superfund Site                               | US        | CA          | cVOCs                                            | Hydrocarbon-derived                    | 3.74  | Solvent Vapor Extraction | Granular activated carbon was utilized for bioremediation             | [78,82]  |
| 11 | Niger Delta region                                            | Nigeria   | Niger-Delta | TPH, petroleum hydrocarbons                      | Hydrocarbon-derived                    | 4.00  | Biostimulation           | Remediate soil to 50% of initial TPH.                                 | [44]     |
| 12 | Davis-Monthan AFB, Site ST-35                                 | US        | AZ          | TPH, cVOCs                                       | Hydrocarbon-derived                    | 4.70  | Solvent Vapor Extraction |                                                                       | [78,83]  |
| 13 | Kelly AFB                                                     | US        | TX          | Reductive dehalogenation of Chlorinated Solvents | Organic solvent-derived                | 5.15  | Bioventing               |                                                                       | [78]     |
| 14 | Plattsburgh AFB                                               | US        | NY          | different hazardous waste, TPH                   | Hydrocarbon-derived                    | 5.23  | Bioventing               |                                                                       | [78,84]  |
| 15 | Niger Delta region                                            | Nigeria   | Niger-Delta | TPH, petroleum hydrocarbons                      | Hydrocarbon-derived                    | 6.00  | Biostimulation           | Remediate soil to 50% of initial TPH.                                 | [44]     |
| 16 | Beale AFB                                                     | US        | CA          | VOCs                                             | Hydrocarbon-derived                    | 7.20  | Bioventing               |                                                                       | [78,85]  |
| 17 | Battle Creek ANGB                                             | US        | MI          | BTEX y VOCs                                      | Hydrocarbon-derived                    | 8.05  | Bioventing               |                                                                       | [78,86]  |
| 18 | Rocky Mountain Arsenal Superfund Site, Motor Pool Area, OU 18 | US        | CO          | cVOCs                                            | Hydrocarbon-derived                    | 8.17  | Solvent Vapor Extraction | Granular activated carbon was utilized.                               | [78,87]  |
| 19 | Nellis AFB                                                    | US        | NV          | Hazardous materials, COCs, TPH                   | Hydrocarbon-derived                    | 9.04  | Bioventing               |                                                                       | [78]     |
| 20 | Inveresk Railyard, Launceston, Australia                      | Australia | Tasmania    | TPH                                              | Hydrocarbon-derived                    | 10.32 | Biostimulation           | C:N and C:P ratios were adjusted to 28 : 1 and 200 : 1, respectively. | [88, 89] |
| 21 | Randolph AFB                                                  | US        | TX          | Chlorinated solvents                             | Halogenated volatile organic compounds | 10.44 | Bioventing               |                                                                       | [78,90]  |

|    |                                    |         |             |                                                                                                                              |                         |       |                |                                                     |         |
|----|------------------------------------|---------|-------------|------------------------------------------------------------------------------------------------------------------------------|-------------------------|-------|----------------|-----------------------------------------------------|---------|
| 22 | Eglin AFB                          | US      | FL          | JP-4 jet fuel spill                                                                                                          | Hydrocarbon-derived     | 11.16 | Bioventing     |                                                     | [78,91] |
| 23 | LA AFB                             | US      | CA          | organic compounds, including chlorinated volatile organic compounds (VOCs), PAHs, pesticides and herbicides, and explosives. | Hydrocarbon-derived     | 11.17 | Bioventing     |                                                     | [78,92] |
| 24 | Niger Delta region                 | Nigeria | Niger-Delta | TPH, petroleum hydrocarbons                                                                                                  | Hydrocarbon-derived     | 12.00 | Biostimulation | Remediate soil to 50% of initial TPH.               | [44]    |
| 25 | Cannon AFB                         | US      | NM          | VOCs                                                                                                                         | Hydrocarbon-derived     | 12.39 | Bioventing     |                                                     | [78,93] |
| 26 | Bolling AFB                        | US      | DC          | BTEX                                                                                                                         | Hydrocarbon-derived     | 12.70 | Bioventing     |                                                     | [78,94] |
| 27 | McClellan AFB                      | US      | CA          | Volatile Organic Compounds (VOCs), toxic and hazardous chemicals                                                             | Hydrocarbon-derived     | 15.30 | Bioventing     | Soil Vapor Extraction                               | [78]    |
| 28 | Westover AFB                       | US      | MA          | hazardous materials, TPH                                                                                                     | Hydrocarbon-derived     | 15.56 | Bioventing     |                                                     | [78]    |
| 29 | Bioventing (median among 12 sites) | US      | -           | hazardous materials, TPH                                                                                                     | Hydrocarbon-derived     | 15.70 | Bioventing     |                                                     | [95]    |
| 30 | Glasgow Air Force Base UST Removal | US      | MT          | PHC                                                                                                                          | Hydrocarbon-derived     | 16.34 | Biostimulation | Bioremediation primarily consisted in soil tilling. | [78]    |
| 31 | Elmendorf AFB                      | US      | AK          | TPH y BTEX                                                                                                                   | Hydrocarbon-derived     | 16.34 | Bioventing     |                                                     | [78,96] |
| 32 | Vandenberg AFB                     | US      | CA          | éter metil terbutílico (MTBE)                                                                                                | Organic solvent-derived | 17.13 | Bioventing     |                                                     | [78,97] |
| 33 | Hanscom AFB                        | US      | MA          | different hazardous waste, TPH and jet fuel                                                                                  | Hydrocarbon-derived     | 17.66 | Bioventing     |                                                     | [78,98] |

|    |                            |    |    |                                                                                |                     |       |                  |                                                                  |          |
|----|----------------------------|----|----|--------------------------------------------------------------------------------|---------------------|-------|------------------|------------------------------------------------------------------|----------|
| 34 | Grissom AFB                | US | IN | TPH                                                                            | Hydrocarbon-derived | 19.09 | Bioventing       |                                                                  | [78,99]  |
| 35 | Offutt AFB                 | US | NE | VOCs                                                                           | Hydrocarbon-derived | 19.36 | Bioventing       |                                                                  | [78]     |
| 36 | Phytoremediation (2 sites) | US | -  | hazardous materials, TPH                                                       | Hydrocarbon-derived | 20.93 | Phytoremediation |                                                                  | [19]     |
| 37 | Ellsworth AFB              | US | SD | TPH y BTEX                                                                     | Hydrocarbon-derived | 24.06 | Bioventing       |                                                                  | [78,100] |
| 38 | FE Warren AFB              | US | WY | VOCs, TCE                                                                      | Hydrocarbon-derived | 24.72 | Bioventing       |                                                                  | [78,101] |
| 39 | Hickam AFB                 | US | HI | hazardous substances, pollutants or contaminants including oil                 | Hydrocarbon-derived | 25.77 | Bioventing       |                                                                  | [78,102] |
| 40 | Pease AFB                  | US | NH | hazardous waste and petroleum releases, perfluorinated compounds (PFC's)       | Hydrocarbon-derived | 25.90 | Bioventing       |                                                                  | [78]     |
| 41 | Shaw AFB                   | US | SC | hazardous materials, TPH, perchloroethylene and trichloroethylene              | Hydrocarbon-derived | 26.16 | Bioventing       |                                                                  | [78]     |
| 42 | AFP PJKS                   | US | CO | fuel hydrocarbons (e.g., JP4 jet fuel, diesel fuel, gasoline, and heating oil) | Hydrocarbon-derived | 29.69 | Bioventing       |                                                                  | [78,103] |
| 43 | Tinker AFB                 | US | OK | hazardous chemicals                                                            | various             | 30.21 | Bioventing       | Soil-vapor extraction (SVE)                                      | [78]     |
| 44 | Camp Pendleton             | US | CA | not defined                                                                    | various             | 31.26 | Bioventing       |                                                                  | [78,104] |
| 45 | Lowry AFB                  | US | CO | BTEX, PHC                                                                      | Hydrocarbon-derived | 31.52 | Biostimulation   | Conducted on plastic sheeting, nutrients added once and aerated. | [92]     |
| 46 | USCG Supp. Cen. Kodiak     | US | AK | hazardous waste and petroleum releases                                         | Hydrocarbon-derived | 31.91 | Bioventing       |                                                                  | [78]     |

|    |                                           |         |             |                                             |                                        |       |                          |                                                                        |           |
|----|-------------------------------------------|---------|-------------|---------------------------------------------|----------------------------------------|-------|--------------------------|------------------------------------------------------------------------|-----------|
| 47 | Davis-Monthan                             | US      | TX          | TPH y BTEX                                  | Hydrocarbon-derived                    | 32.04 | Bioventing               | Soil-vapor extraction (SVE)                                            | [78]      |
| 48 | Kirtland AFB                              | US      | NM          | TPH, different hazardous waste              | Hydrocarbon-derived                    | 32.70 | Bioventing               |                                                                        | [78]      |
| 49 | Cape Canaveral AFB                        | US      | FL          | different hazardous waste                   | Hydrocarbon-derived                    | 34.92 | Bioventing               |                                                                        | [78,105]  |
| 50 | Havre Air Force Station                   | US      | MT          | BTEX                                        | Hydrocarbon-derived                    | 35.71 | Biostimulation           | Application primarily consisted of soil plowing and tilling            | [78]      |
| 51 | McGuire AFB                               | US      | NJ          | cVOCs                                       | Hydrocarbon-derived                    | 38.85 | Bioventing               |                                                                        | [78,106]  |
| 52 | Mt. Hope AFB                              | US      | ID          | different hazardous waste                   | various                                | 40.42 | Bioventing               |                                                                        | [78,107]  |
| 53 | Median between 2 sites (Bedford, IN)      | US      | IN          | hazardous materials, TPH                    | Hydrocarbon-derived                    | 41.85 | Various                  |                                                                        | [95]      |
| 54 | Amcor Precast                             | US      | UT          | TPH, BTEX                                   | Hydrocarbon-derived                    | 41.96 | Solvent Vapor Extraction | Density-Driven Groundwater Sparging and Soil Vapor Extraction - System | [78,108]  |
| 55 | Dane County Regional Airport, Truaz Field | US      | WI          | per- and polyfluoroalkyl substances (PFASs) | Halogenated volatile organic compounds | 42.90 | Thermal treatment        |                                                                        | [78,109]  |
| 56 | Shaw AFB, OU 1                            | US      | SC          | TPH                                         | Hydrocarbon-derived                    | 43.58 | Solvent Vapor Extraction | catalytic oxidation                                                    | [78,7]    |
| 57 | Niger Delta region                        | Nigeria | Niger-Delta | TPH, petroleum hydrocarbons                 | Hydrocarbon-derived                    | 44.00 | Biostimulation           | Remediate soil to 50% of initial TPH.                                  | [44]      |
| 58 | Ft. Drum                                  | US      | NY          | VOCs, TCE                                   | Hydrocarbon-derived                    | 47.34 | Bioventing               |                                                                        | [78,110]  |
| 59 | British Gas                               | UK      | UK          | Cu, Zn, Ni, PAH, phenols, cyanide, and BTEX | various                                | 47.80 | Others                   |                                                                        | [88, 111] |

|    |                                                                    |    |    |                                                                                |                                        |       |                          |                                                                                   |          |
|----|--------------------------------------------------------------------|----|----|--------------------------------------------------------------------------------|----------------------------------------|-------|--------------------------|-----------------------------------------------------------------------------------|----------|
| 60 | Camp LeJeune Military Reservation Superfund Site, Site 82, Area A  | US | NC | cVOCs, BTEX                                                                    | Hydrocarbon-derived                    | 48.11 | Solvent Vapor Extraction | The system required the use of granular activated carbon                          | [78]     |
| 61 | Fort Campell POL Site                                              | US | KY | hazardous materials, TPH                                                       | Hydrocarbon-derived                    | 49.40 | Thermal treatment        |                                                                                   | [92]     |
| 62 | Fairchild AFB                                                      | US | WA | Trichloroethene (TCE)                                                          | Halogenated volatile organic compounds | 50.74 | Bioventing               |                                                                                   | [78,112] |
| 63 | Edwards AFB                                                        | US | CA | Chlorinated Solvents, Primary contaminant in groundwater-trichloroethene (TCE) | Halogenated volatile organic compounds | 51.14 | Bioventing               |                                                                                   | [78,113] |
| 64 | Fort Lewis Solvent Refined Coal Pilot Plant                        | US | WA | PAHs                                                                           | Hydrocarbon-derived                    | 51.22 | Thermal treatment        |                                                                                   | [78,114] |
| 65 | Pope AFB                                                           | US | NC | TPH, JP-4 fuel                                                                 | Hydrocarbon-derived                    | 53.50 | Bioventing               |                                                                                   | [78]     |
| 66 | British Gas                                                        | UK | UK | Cu, Zn, Ni, PAH, phenols, cyanide, and BTEX                                    | various                                | 59.90 | Various                  |                                                                                   | [88, 35] |
| 67 | Malmstrom AFB                                                      | US | MT | benzene, toluene, ethylbenzene, and xylenes (BTEX)                             | Hydrocarbon-derived                    | 67.23 | Bioventing               |                                                                                   | [78,115] |
| 68 | British Gas                                                        | UK | UK | Cu, Zn, Ni, PAH, phenols, cyanide, and BTEX                                    | Hydrocarbon-derived                    | 71.40 | Others                   |                                                                                   | [44, 12] |
| 69 | Little Rock AFB                                                    | US | AR | Jet fuel and benzene vapor                                                     | Hydrocarbon-derived                    | 72.59 | Bioventing               |                                                                                   | [78,116] |
| 70 | Verona Well Field Superfund Site, Thomas Solvent Raymond Road OU 1 | US | MI | cVOCs                                                                          | Hydrocarbon-derived                    | 83.11 | Solvent Vapor Extraction | The system required the use of granular activated carbon and catalytic oxidation. | [78,117] |
| 71 | Alameda Naval Air Station,                                         | US | CA | hazardous materials, TPH                                                       | Hydrocarbon-derived                    | 88.92 | Thermal treatment        |                                                                                   | [78]     |

|    |                                                      |    |    |                                                                                                                             |                                        |        |                          |                                                                                                       |           |
|----|------------------------------------------------------|----|----|-----------------------------------------------------------------------------------------------------------------------------|----------------------------------------|--------|--------------------------|-------------------------------------------------------------------------------------------------------|-----------|
|    | Interim Soil Removal                                 |    |    |                                                                                                                             |                                        |        |                          |                                                                                                       |           |
| 72 | Holloman AFB, Sites 2 and 5                          | US | NM | BTEX                                                                                                                        | Hydrocarbon-derived                    | 89.03  | Solvent Vapor Extraction | It required the use of a bioreactor.                                                                  | [78, 83]  |
| 73 | Sand Creek Industrial Superfund Site, OU 1           | US | CO | cVOCs, TPH                                                                                                                  | Hydrocarbon-derived                    | 95.06  | Solvent Vapor Extraction | The process required a catalytic oxidation (CATOX) unit for vapor extraction.                         | [78, 118] |
| 74 | Median between 9 sites                               | US | -  | hazardous materials, TPH                                                                                                    | Hydrocarbon-derived                    | 95.48  | Bioventing               |                                                                                                       | [95]      |
| 75 | Charleston AFB                                       | US | SC | TPH y BTEX                                                                                                                  | Hydrocarbon-derived                    | 98.09  | Bioventing               |                                                                                                       | [78, 119] |
| 76 | Longhorn Army Ammunition Plant, Burning Ground No. 3 | US | TX | Organic Compounds Volatiles (Halogenated), Methylene Chloride, Trichloroethylene (TCE)                                      | Halogenated volatile organic compounds | 98.41  | Thermal treatment        |                                                                                                       | [78, 120] |
| 77 | Fort Greely UST Soil Piles                           | US | AK | BTEX, PHC                                                                                                                   | Hydrocarbon-derived                    | 99.92  | Others                   |                                                                                                       | [78]      |
| 78 | Median between 30 sites                              | US | -  | hazardous materials, TPH                                                                                                    | Hydrocarbon-derived                    | 100.71 | Various                  |                                                                                                       | [95]      |
| 79 | Brown Wood Preserving Superfund Site                 | US | FL | PAHs                                                                                                                        | Hydrocarbon-derived                    | 102.54 | Various                  | The site has a moderate initial contaminant concentrations                                            | [78]      |
| 80 | FCX Washington Superfund Site                        | US | NC | Pesticides; Aldrin, chlordane, DDT, DDE, DDD, dieldrin, heptachlor, heptachlor epoxide, methoxychlor, benzene hexachlorides | Halogenated volatile organic compounds | 102.70 | Thermal treatment        | The thermal desorption required a IRHV-200 vacuum-enhanced low temperature thermal desorption system. | [78, 121] |

|    |                                                    |    |    |                                                                                                                                                                                                             |                                                   |        |                          |                                                                          |           |
|----|----------------------------------------------------|----|----|-------------------------------------------------------------------------------------------------------------------------------------------------------------------------------------------------------------|---------------------------------------------------|--------|--------------------------|--------------------------------------------------------------------------|-----------|
| 81 | Kelly AFB, Area 1100                               | US | TX | TPH                                                                                                                                                                                                         | Hydrocarbon-derived                               | 108.38 | Solvent Vapor Extraction |                                                                          | [78]      |
| 82 | TH Agriculture & Nutrition Company Superfund Site  | US | GA | organochlorine (OCL) pesticides                                                                                                                                                                             | Halogenated volatile organic compounds            | 112.19 | Thermal treatment        |                                                                          | [78, 122] |
| 83 | French Limited Superfund Site                      | US | TX | cVOCs, PAHs, Other SVOCs, Other VOCs, PCBs                                                                                                                                                                  | Hydrocarbon-derived                               | 116.93 | Others                   | Extremely large volume.                                                  | [78]      |
| 84 | March AFB                                          | US | CA | volatile organic compounds and heavy metals                                                                                                                                                                 | Hydrocarbon-derived and metals                    | 123.21 | Bioventing               |                                                                          | [78]      |
| 85 | Arlington Blending & Packaging Superfund Site      | US | TN | benzene; chlorodane; 1,1-dichloroethene (1,1-DCE); endrin; heptachlor epoxide; pentachlorophenol (PCP); toluene; xylenes, chlordane, heptachlor, endrin, arsenic, heptachlor epoxide, and PCP in the soils. | Halogenated volatile organic compounds and metals | 128.31 | Thermal treatment        | The system required excavation, stockpiling, treatment, and backfilling. | [78]      |
| 86 | Fort Wainwright, North Post Site Soil Remediation  | US | AK | BTEX                                                                                                                                                                                                        | Hydrocarbon-derived                               | 133.41 | Biostimulation           |                                                                          | [78]      |
| 87 | Defense Supply Center Richmond Superfund Site      | US | VA | cVOCs                                                                                                                                                                                                       | Hydrocarbon-derived                               | 134.25 | Solvent Vapor Extraction | The system required the use of granular activated carbon.                | [78]      |
| 88 | Fairchild Semiconductor Corporation Superfund Site | US | CA | cVOCs, BTEX                                                                                                                                                                                                 | Hydrocarbon-derived                               | 138.35 | Solvent Vapor Extraction | The system required the use of granular activated carbon.                | [78, 123] |
| 89 | Median between 17 sites                            | US |    | hazardous materials, TPH                                                                                                                                                                                    | Hydrocarbon-derived                               | 138.64 | Various                  |                                                                          | [95]      |
| 90 | Commencement Bay, South                            | US | WA | cVOCs                                                                                                                                                                                                       | Hydrocarbon-derived                               | 140.38 | Solvent Vapor Extraction |                                                                          | [78, 124] |

|    |                                            |         |             |                                                    |                                        |        |                   |                                                                                                       |           |
|----|--------------------------------------------|---------|-------------|----------------------------------------------------|----------------------------------------|--------|-------------------|-------------------------------------------------------------------------------------------------------|-----------|
|    | Tacoma Channel Well 12A Superfund Site     |         |             |                                                    |                                        |        |                   |                                                                                                       |           |
| 91 | Patrick AFB                                | US      | FL          | benzene, toluene, ethylbenzene, and xylene (BTEX)  | Hydrocarbon-derived                    | 141.26 | Bioventing        |                                                                                                       | [78, 125] |
| 92 | Niger Delta region                         | Nigeria | Niger-Delta | TPH, petroleum hydrocarbons                        | Hydrocarbon-derived                    | 165.00 | Biostimulation    | Remediate soil to 50% of initial TPH.                                                                 | [44]      |
| 93 | Matagora Island Air Force Base             | US      | TX          | BTEX                                               | Hydrocarbon-derived                    | 202.73 | Others            |                                                                                                       | [78]      |
| 94 | Sikes Disposal Pits                        | US      | TX          | Organic and phenolic compounds                     | Hydrocarbon-derived                    | 208.00 | Thermal treatment | The system required the use of rotary kiln, SCC, quench section, and two-stage scrubber.              | [78]      |
| 95 | Letterkenny Army Depot                     | US      | PA          | Volatile Organic Compounds and Metals              | Hydrocarbon-derived and metals         | 210.60 | Thermal treatment | Low Temperature Thermal Desorption was applied.                                                       | [78]      |
| 96 | Naval Air Station Cecil Field              | US      | FL          | Petroleum products (BTEX) and chlorinated solvents | Hydrocarbon-derived                    | 217.10 | Thermal treatment | The system included pump and treat and Soil Vapor Extraction system.                                  | [78]      |
| 97 | Niger Delta region                         | Nigeria | Niger-Delta | TPH, petroleum hydrocarbons                        | Hydrocarbon-derived                    | 223.00 | Biostimulation    | Remediate soil to 50% of initial TPH.                                                                 | [44]      |
| 98 | Hill AFB, Site 914                         | US      | UT          | BTEX, PHC                                          | Hydrocarbon-derived                    | 226.27 | Others            | Early bioventing application.                                                                         | [78]      |
| 99 | Sand Creek Industrial Superfund Site, OU 5 | US      | CO          | Organochlorine pesticides                          | Halogenated volatile organic compounds | 227.50 | Thermal treatment | System consisted of a rotary kiln, two sulfur-impregnated vapor-phase carbon units, four liquid-phase | [78, 126] |

|     |                            |         |             |                                                                                                                                       |                                                   |        |                   |                                                                               |           |
|-----|----------------------------|---------|-------------|---------------------------------------------------------------------------------------------------------------------------------------|---------------------------------------------------|--------|-------------------|-------------------------------------------------------------------------------|-----------|
|     |                            |         |             |                                                                                                                                       |                                                   |        |                   | carbon units (1,000 lb each), cyclones, a baghouse, and a packed bed scrubber |           |
| 100 | Niger Delta region         | Nigeria | Niger-Delta | TPH, petroleum hydrocarbons                                                                                                           | Hydrocarbon-derived                               | 229.00 | Biostimulation    | Remediate soil to 50% of initial TPH.                                         | [44]      |
| 101 | Travis AFB                 | US      | CA          | volatile organic compounds (VOCs), metals and polycyclic aromatic hydrocarbons (PAHs)                                                 | Hydrocarbon-derived                               | 244.59 | Bioventing        |                                                                               | [78]      |
| 102 | Niger Delta region         | Nigeria | Niger-Delta | TPH, petroleum hydrocarbons                                                                                                           | Hydrocarbon-derived                               | 250.00 | Biostimulation    | Remediate soil to 50% of initial TPH.                                         | [44]      |
| 103 | Metaltec                   | US      | NJ          | Chlorinated Volatile Organic Compounds (VOCs) and Heavy Metals                                                                        | Halogenated volatile organic compounds and metals | 256.10 | Thermal treatment | A low temperature enhanced volatilization system was applied.                 | [78, 127] |
| 104 | Median between 7 sites     | US      | -           | hazardous materials, TPH                                                                                                              | Hydrocarbon-derived                               | 261.59 | Various           |                                                                               | [19]      |
| 105 | Niger Delta region         | Nigeria | Niger-Delta | TPH, petroleum hydrocarbons                                                                                                           | Hydrocarbon-derived                               | 262.00 | Biostimulation    | Remediate soil to 50% of initial TPH.                                         | [44]      |
| 106 | Niger Delta region         | Nigeria | Niger-Delta | TPH, petroleum hydrocarbons                                                                                                           | Hydrocarbon-derived                               | 268.00 | Biostimulation    | Remediate soil to 50% of initial TPH.                                         | [44]      |
| 107 | Sarney Farm Superfund Site | US      | NY          | Volatile Organic Compounds / Seven contaminants of concern (COCs) were identified including 1,2-dichloroethane, 2-butanone, 4-methyl- | Hydrocarbon-derived                               | 304.20 | Thermal treatment | A low temperature thermal desorption (LTTD) system was utilized.              | [78, 128] |

|     |                                                   |    |    |                                                                                          |                     |        |                          |                                                                                                    |           |
|-----|---------------------------------------------------|----|----|------------------------------------------------------------------------------------------|---------------------|--------|--------------------------|----------------------------------------------------------------------------------------------------|-----------|
|     |                                                   |    |    | 2-pentanone, chloroform, toluene, trichloroethene, total xylenes                         |                     |        |                          |                                                                                                    |           |
| 108 | Garden State Cleaners                             | US | NJ | cVOCs                                                                                    | Hydrocarbon-derived | 311.75 | Solvent Vapor Extraction | The process required granular activated carbon.                                                    | [78, 129] |
| 109 | Southeastern Wood Preserving Superfund Site, OU 1 | US | MS | PAHs                                                                                     | Hydrocarbon-derived | 317.83 | Various                  | The process required bioreactor system. The siter has high initial concentrations of contaminants. | [78]      |
| 110 | McKin Company Superfund Site                      | US | ME | VOCs, PAHs                                                                               | Hydrocarbon-derived | 327.60 | Thermal treatment        | The system required a pretreatment for solids and a post-treatment phase for water.                | [78, 130] |
| 111 | Rocky Flats Environmental Technology Site         | US | CO | VOCs, asbestos, hazardous waste, metals, uranium, plutonium, and americium contamination | various             | 338.00 | Thermal treatment        | The process required a seep-treatment system.                                                      | [78]      |
| 112 | Reich Farm Superfund Site                         | US | NJ | Volatile Organic Compounds (VOCs) and Semivolatile Organic Compounds (SVOCs)             | Hydrocarbon-derived | 351.00 | Thermal treatment        | Low temperature volatilization system (LTVS)                                                       | [78]      |
| 113 | Median between 10 sites                           | US | -  | hazardous materials, TPH                                                                 | Hydrocarbon-derived | 367.53 | Various                  |                                                                                                    | [95]      |
| 114 | Bayou Bonfouca                                    | US | LA | PAHs                                                                                     | Hydrocarbon-derived | 390.00 | Thermal treatment        | It was performed in a Rotary kiln, SCC, quench system, gas conditioner,                            | [78, 131] |

|     |                                            |    |    |                                                                                          |                                        |        |                          |                                                                                                                   |           |
|-----|--------------------------------------------|----|----|------------------------------------------------------------------------------------------|----------------------------------------|--------|--------------------------|-------------------------------------------------------------------------------------------------------------------|-----------|
|     |                                            |    |    |                                                                                          |                                        |        |                          | scrubber, and mist eliminator.                                                                                    |           |
| 115 | SMS Instruments Superfund Site             | US | NY | cVOCs, VOCs, PHC                                                                         | Hydrocarbon-derived                    | 432.32 | Solvent Vapor Extraction | The process required catalytic oxidation and scrubbing.                                                           | [78, 132] |
| 116 | Dover AFB, Area 6                          | US | DE | cVOCs, Heavy metals                                                                      | Hydrocarbon-derived and metals         | 432.93 | Bioventing               | The process required direct injection of air and propane.                                                         | [78]      |
| 117 | AFP 4                                      | US | TX | chlorinated volatile organic compound (VOC) soil vapors, primarily trichloroethene (TCE) | Halogenated volatile organic compounds | 435.55 | Bioventing               | The process required flameless thermal oxidation (FTO).                                                           | [78, 133] |
| 118 | Outboard Marine Corporation Superfund Site | US | IL | polychlorinated biphenyls (PCBs)                                                         | Halogenated volatile organic compounds | 481.00 | Thermal treatment        | Treatment system included excavation, stockpiling, and treatment of PCB-contaminated soil and sediment.           | [78, 134] |
| 119 | Dubose Oil Products Co. Superfund Site     | US | FL | BTEX, cVOCs, Other, SVOCs, Other, VOCs                                                   | Hydrocarbon-derived                    | 497.02 | Various                  | Treatment system included leachate collection, inoculant generation, vacuum extractions, and wastewater treatment | [78]      |
| 120 | Former Nebraska Ordnance Plant             | US | NE | Explosives and propellants                                                               | various                                | 559.00 | Thermal treatment        | It was performed in a rotary kiln, quench duct, baghouse, and packed-bed scrubber system.                         | [78, 135] |

|     |                                              |         |             |                                            |                                         |        |                   |                                                                                           |           |
|-----|----------------------------------------------|---------|-------------|--------------------------------------------|-----------------------------------------|--------|-------------------|-------------------------------------------------------------------------------------------|-----------|
| 121 | Celanese Corporation Shelby Fiber Operations | US      | NC          | Ethylene glycol, VOCs, PAHs, Phenol        | Hydrocarbon and organic solvent-derived | 572.00 | Thermal treatment | It was performed in a rotary kiln, quench duct, baghouse, and packed-bed scrubber system. | [78, 136] |
| 122 | Wide Beach Development Superfund Site        | US      | NY          | polychlorinated biphenyls (PCBs)           | Halogenated volatile organic compounds  | 596.70 | Thermal treatment | It was based on a dehalogenation treatment.                                               | [78, 137] |
| 123 | Umatilla Army Depot Activity (FS)            | US      | OR          | Other SVOCs                                | Hydrocarbon-derived                     | 626.51 | Biostimulation    | Included addition of compost                                                              | [78]      |
| 124 | Port Moller Radio Relay Station              | US      | AK          | Oil spills, GRO, BTEX, DRO and TRPH        | Hydrocarbon-derived                     | 644.80 | Thermal treatment | It required a post-treatment (off-gas), including oxidizer and baghouse.                  | [78, 138] |
| 125 | Re-Solve, Inc. Superfund Site                | US      | MA          | hazardous materials, waste oil, VOCs, PCBs | Hydrocarbon-derived                     | 712.40 | Thermal treatment | It required two-tiered groundwater extraction and treatment system.                       | [78]      |
| 126 | Niger Delta region                           | Nigeria | Niger-Delta | TPH, petroleum hydrocarbons                | Hydrocarbon-derived                     | 715.00 | Biostimulation    | Remediate soil to 50% of initial TPH.                                                     | [44]      |
| 127 | Waldick Aerospace Devices Superfund Site     | US      | NJ          | BTEX, PHC, VOC, metals                     | Hydrocarbon-derived and metals          | 725.40 | Thermal treatment | It required thermal desorption, followed by off-site stabilization and solidification.    | [78]      |
| 128 | Scott Lumber Company Superfund Site          | US      | MO          | PAHs                                       | Hydrocarbon-derived                     | 808.31 | Bioaugmentation   | It included irrigation and drainage system, and addition of nutrient and culture.         | [78, 139] |

|     |                                                             |    |    |                                                                                                      |                         |         |                             |                                                                     |           |
|-----|-------------------------------------------------------------|----|----|------------------------------------------------------------------------------------------------------|-------------------------|---------|-----------------------------|---------------------------------------------------------------------|-----------|
| 129 | Sacramento<br>Army Depot<br>Superfund Site,<br>Burn Pits OU | US | CA | VOCs, cVOCs                                                                                          | Hydrocarbon-<br>derived | 1363.12 | Solvent Vapor<br>Extraction | The process<br>required the use<br>of granular<br>activated carbon. | [78]      |
| 130 | MOTCO                                                       | US | TX | benzene, vinyl<br>chloride, 1,1,2-<br>trichloroethane, lead,<br>cadmium,<br>mercury, and<br>chromium | various                 | 1820.00 | Thermal<br>treatment        | It was performed<br>in a rotary kiln.                               | [78, 140] |
