# Supplementary material for: Economic Evaluation of Bioremediation of Hydrocarbon-Contaminated Urban Soils in Chile
Source: MDPI journal article supplement (doi:10.3390/su141911854), 2022-09-21
Supplement: s1 [file s1 › Table_S4_Product_costs_and_period_costs_MS.pdf]

**Table S4:** Products and period costs of the different bioremediation approaches. The abbreviations as following; BA, bioaugmentation, with the addition of five hydrocarbonoclastic strain; BAV, bioaugmentation with the addition of permanent air venting; BE1 and BE4, biostimulation with the addition of compost in two different ratios, 9:1 (v/v) and 3:2 (v/v), respectively; and BAE, the combination of bioaugmentation and biostimulation, using a mixture of soil and compost with 3:2 (v/v) ratio.

|                                                 |                              |                     |                          |                     |                          |                     |                          |                     |                          |                     |                          |
|-------------------------------------------------|------------------------------|---------------------|--------------------------|---------------------|--------------------------|---------------------|--------------------------|---------------------|--------------------------|---------------------|--------------------------|
| <b>1. Products costs</b>                        |                              | BE1                 |                          | BE4                 |                          | BAE                 |                          | BA                  |                          | BAV                 |                          |
| <b>1.a. Direct material costs</b>               | Unit cost                    | Quantity            | Treatment cost (USD)     |
| Compost (m³)                                    | US\$100                      | 625                 | US\$62,500               | 2,500               | US\$250,000              | 2,500               | US\$250,000              | 0                   | US\$0                    | 0                   | US\$0                    |
| BHB media (m³)                                  | US\$1,074                    | 0                   | US\$0                    | 0                   | US\$0                    | 285                 | US\$306,084              | 285                 | US\$306,084              | 285                 | US\$306,084              |
| Electricity (kWh)                               | US\$0.10                     |                     | US\$0                    |                     | US\$0                    | 28,980              | US\$2,898                | 28,980              | US\$2,898                | 110,580             | US\$11,058               |
| Water (m³)                                      | US\$4.21                     | 5,000               | US\$21,050               | 5,000               | US\$21,050               | 5,456               | US\$22,970               | 5,456               | US\$22,970               | 5,456               | US\$22,970               |
| Diesel oil (l)                                  | US\$0.72                     | 7,288               | US\$5,247                |
| <b>1a.a. Total direct material costs</b>        |                              |                     | <b>US\$88,797</b>        |                     | <b>US\$276,297</b>       |                     | <b>US\$587,199</b>       |                     | <b>US\$337,199</b>       |                     | <b>US\$345,359</b>       |
| <b>1.b Direct labor costs</b>                   | Monthly salary               | Quantity            | Treatment cost (USD)     |
| Operator                                        | US\$770                      | 3                   | US\$42                   | 3                   | US\$10,662               | 4                   | US\$14,215               | 4                   | US\$14,215               | 4                   | US\$14,215               |
| Truck driver                                    | US\$770                      | 2                   | US\$28                   | 2                   | US\$7,108                | 2                   | US\$7,108                | 2                   | US\$7,108                | 2                   | US\$7,108                |
| <b>1.b.a Total direct labor costs</b>           |                              |                     | <b>US\$69</b>            |                     | <b>US\$17,769</b>        |                     | <b>US\$21,323</b>        |                     | <b>US\$21,323</b>        |                     | <b>US\$21,323</b>        |
| <b>1.c. Manufacturing overhead costs</b>        | Monthly salary               | Quantity            | Treatment cost (USD)     |
| Supervisor                                      | US\$924                      | 2                   | US\$8,529                |
| Risk preventionist                              | US\$1,232                    | 1                   | US\$5,686                |
| Security**                                      | US\$739                      | 3                   | US\$10,232               |
| <b>1.c.1 Other manufacturing overhead costs</b> | Useful life (years)          | Annual depreciation | Dep. per treatment (USD) |
| Depreciation                                    | 10                           | US\$100,000         | US\$0                    | US\$100,000         | US\$0                    | US\$24,963          | US\$0                    | US\$578,901         | US\$0                    | US\$578,901         | US\$0                    |
| <b>1.c.2 Other manufacturing QC costs</b>       | Cost for monitoring per pile | Number of biopiles  | Treatment cost (USD)     |
| Monitoring and Quality Control                  | US\$2,750                    | 10                  | US\$27,500               |
| <b>1.c.a Total manufacturing overhead costs</b> |                              |                     | <b>US\$51,948</b>        |
| <b>1.1. Total product's costs</b>               |                              |                     | <b>US\$140,814</b>       |                     | <b>US\$346,014</b>       |                     | <b>US\$660,469</b>       |                     | <b>US\$410,469</b>       |                     | <b>US\$418,629</b>       |
| <b>2. Period costs</b>                          |                              | BE1                 |                          | BE4                 |                          | BAE                 |                          | BA                  |                          | BAV                 |                          |

|                                                            |                |          |                      |          |                      |          |                      |          |                      |          |                      |
|------------------------------------------------------------|----------------|----------|----------------------|----------|----------------------|----------|----------------------|----------|----------------------|----------|----------------------|
| <b>2.a. Administrative expenses</b>                        | Annual cost    |          | Treatment cost (USD) |
| Building Maintenance                                       | US\$770        |          | US\$296              |
| Office supplies**                                          | US\$1,540      |          | US\$592              |
| Energy for offices**                                       | US\$1,832      |          | US\$705              |
| Office services                                            |                |          | US\$2,240            |
| Maintenance                                                |                |          | US\$2,400            |
| <b>2.a.1. Other Administrative expenses: Remunerations</b> | Monthly salary | Quantity | Treatment cost (USD) |
| Management Positions                                       | US\$1,848      | 1        | US\$8,529            |
| Administrative Charges                                     | US\$1,078      | 1        | US\$4,975            |
| Personal for cleaning**                                    | US\$626        | 1        | US\$2,889            |
| <b>2.a.a Total Administrative expenses</b>                 |                |          | <b>US\$22,627</b>    |
| <b>2.b Marketing and selling expenses</b>                  | Annual cost    |          | Treatment cost (USD) |
| Publicity**                                                | US\$3,080      |          | US\$1,185            |
| <b>2.b.a Total Marketing and selling expenses</b>          |                |          | <b>US\$1,185</b>     |
| <b>2.1. Total period costs</b>                             |                |          | <b>US\$23,812</b>    |
| <b>TOTAL COSTS*</b>                                        |                |          | <b>US\$164,626</b>   |          | <b>US\$369,826</b>   |          | <b>US\$684,281</b>   |          | <b>US\$434,281</b>   |          | <b>US\$442,441</b>   |

\* Since each treatment lasts 20 weeks (and 0.6 treatments cannot be done) the provision to cover the fixed costs of the 12 weeks during which no treatment will be done must be added to the total cost.

\*\*These costs have been increased to adjust them to a real scenario.
