# Supplementary material for: Economic Evaluation of Bioremediation of Hydrocarbon-Contaminated Urban Soils in Chile
Source: MDPI journal article supplement (doi:10.3390/su141911854), 2022-09-21
Supplement: s1 [file s1 › Table_S5_Machinery_depreciation_w_header_MS.pdf]

|                                                       | BE1        |                  | BE4      |                  | BAE      |                   | BA       |                   | BAV      |                   |
|-------------------------------------------------------|------------|------------------|----------|------------------|----------|-------------------|----------|-------------------|----------|-------------------|
| Machinery                                             | Quantity** | Amount           | Quantity | Amount           | Quantity | Amount            | Quantity | Amount            | Quantity | Amount            |
| Jacketed reactor 15 m <sup>3</sup> (Culture)          | 0          | US\$0            | 0        | US\$0            | 6        | US\$16.400        | 6        | US\$16.400        | 6        | US\$16.400        |
| Jacketed reactor 0.3 m <sup>3</sup> (Pre-inoculation) | 0          | US\$0            | 0        | US\$0            | 5        | US\$786           | 5        | US\$786           | 5        | US\$786           |
| Blower 0.4 m <sup>3</sup> /s (Culture)                | 0          | US\$0            | 0        | US\$0            | 6        | US\$2.529         | 6        | US\$2.529         | 6        | US\$2.529         |
| Blower 0.0075 m <sup>3</sup> /s (Pre-inoculation)     | 0          | US\$0            | 0        | US\$0            | 5        | US\$184           | 5        | US\$184           | 5        | US\$184           |
| Blower 0.4 m <sup>3</sup> /s (Piles)                  | 0          | US\$0            | 0        | US\$0            | 0        | US\$0             | 0        | US\$0             | 10       | US\$4.215         |
| Spray truck 20 m <sup>3</sup>                         | 1          | US\$1.385        | 1        | US\$1.385        | 1        | US\$1.385         | 1        | US\$1.385         | 1        | US\$1.385         |
| Front shovel loader 2.5 m <sup>3</sup>                | 2          | US\$2.077        | 2        | US\$2.077        | 2        | US\$2.077         | 2        | US\$2.077         | 2        | US\$2.077         |
| <b>Total machinery depreciation</b>                   |            | <b>US\$3.462</b> |          | <b>US\$3.462</b> |          | <b>US\$23.361</b> |          | <b>US\$23.361</b> |          | <b>US\$27.576</b> |

\*Purchase prices were own estimates based on the Chilean market.

\*\*The quantity of machinery required for each treatment was based on our own calculations.
