# Supplementary material for: Economic Evaluation of Bioremediation of Hydrocarbon-Contaminated Urban Soils in Chile
Source: MDPI journal article supplement (doi:10.3390/su141911854), 2022-09-21
Supplement: s1 [file s1 › Table_S6_Recovery_assets_w_header_MS.pdf]

**Table S6:** Recovery assets of the bioremediation treatments after initial investment recovery. The abbreviations as following; BA, bioaugmentation, with the addition of five hydrocarbonoclastic strain; BAV, bioaugmentation with the addition of permanent air venting; BE1 and BE4, biostimulation with the addition of compost in two different ratios, 9:1 (v/v) and 3:2 (v/v), respectively; and BAE, the combination of bioaugmentation and biostimulation, using a mixture of soil and compost with 3:2 (v/v) ratio.

| Year | BE1             |                                    | BE4             |                                    | BAE               |                                    | BA                |                                    | BAV               |                                    |
|------|-----------------|------------------------------------|-----------------|------------------------------------|-------------------|------------------------------------|-------------------|------------------------------------|-------------------|------------------------------------|
|      | Treatment       | per m <sup>3</sup> of treated soil | Treatment       | per m <sup>3</sup> of treated soil | Treatment         | per m <sup>3</sup> of treated soil | Treatment         | per m <sup>3</sup> of treated soil | Treatment         | per m <sup>3</sup> of treated soil |
| 1    | US\$ 356.884,36 | US\$ 70,50                         | US\$ 544.384,36 | US\$ 161,30                        | US\$ 1.776.331,50 | US\$ 526,32                        | US\$ 1.526.331,50 | US\$ 271,35                        | US\$ 1.726.293,20 | US\$ 306,90                        |
| 2    | US\$ 294.384,36 | US\$ 58,15                         | US\$ 481.884,36 | US\$ 142,78                        | US\$ 1.320.791,87 | US\$ 391,35                        | US\$ 1.070.791,87 | US\$ 190,36                        | US\$ 1.188.552,84 | US\$ 211,30                        |
| 3    | US\$ 273.551,03 | US\$ 54,03                         | US\$ 461.051,03 | US\$ 136,61                        | US\$ 1.168.945,32 | US\$ 346,35                        | US\$ 918.945,32   | US\$ 163,37                        | US\$ 1.009.306,05 | US\$ 179,43                        |
| 4    | US\$ 263.134,36 | US\$ 51,98                         | US\$ 450.634,36 | US\$ 133,52                        | US\$ 1.093.022,05 | US\$ 323,86                        | US\$ 843.022,05   | US\$ 149,87                        | US\$ 919.682,66   | US\$ 163,50                        |
| 5    | US\$ 256.884,36 | US\$ 50,74                         | US\$ 444.384,36 | US\$ 131,67                        | US\$ 1.047.468,09 | US\$ 310,36                        | US\$ 797.468,09   | US\$ 141,77                        | US\$ 865.908,62   | US\$ 153,94                        |
| 6    | US\$ 252.717,69 | US\$ 49,92                         | US\$ 440.217,69 | US\$ 130,43                        | US\$ 1.017.098,78 | US\$ 301,36                        | US\$ 767.098,78   | US\$ 136,37                        | US\$ 830.059,27   | US\$ 147,57                        |
| 7    | US\$ 249.741,50 | US\$ 49,33                         | US\$ 437.241,50 | US\$ 129,55                        | US\$ 995.406,42   | US\$ 294,94                        | US\$ 745.406,42   | US\$ 132,52                        | US\$ 804.452,58   | US\$ 143,01                        |
| 8    | US\$ 247.509,36 | US\$ 48,89                         | US\$ 435.009,36 | US\$ 128,89                        | US\$ 979.137,14   | US\$ 290,11                        | US\$ 729.137,14   | US\$ 129,62                        | US\$ 785.247,57   | US\$ 139,60                        |
| 9    | US\$ 245.773,25 | US\$ 48,55                         | US\$ 433.273,25 | US\$ 128,38                        | US\$ 966.483,26   | US\$ 286,37                        | US\$ 716.483,26   | US\$ 127,37                        | US\$ 770.310,34   | US\$ 136,94                        |
| 10   | US\$ 244.384,36 | US\$ 48,27                         | US\$ 431.884,36 | US\$ 127,97                        | US\$ 956.360,16   | US\$ 283,37                        | US\$ 706.360,16   | US\$ 125,58                        | US\$ 758.360,55   | US\$ 134,82                        |
